# Supplementary material for: Limited heat tolerance in a cold-adapted seabird: implications of a warming Arctic
Source: PubMed Central journal article supplement (PMC8278010; doi:10.1242/jeb.242168), 2021-07-07
Supplement: jexbio-224-242168-s1.pdf [file jexbio-224-242168-s1.pdf]

**Table S1. Raw data values of physiological traits measured for heat tolerance [body temperature ( $T_b$ ), resting metabolic rate (RMR), evaporative water loss (EWL), ratio of evaporative heat loss to metabolic heat production (EHL/MHP)] and their associated air temperatures ( $T_a$ ) for thick-billed murres ( $n= 10$ ). The total body mass of murres was measured before (mass 1) and after (mass 2) each heat tolerance run.**

[Click here to download Table S1](#)
